# Supplementary material for: A multi-variable predictive warning model for cervical cancer using clinical and SNPs data
Source: Front Med (Lausanne). 2024 Feb 22;11:1294230. doi: 10.3389/fmed.2024.1294230 (PMC10918689; doi:10.3389/fmed.2024.1294230)
Supplement: Supplementary file 4 [file Data_Sheet_4.XLSX]

## Sheet: Sheet1
SNP	CHR	BP	A1	F_A	F_U	A2	RefGene	Pvalue of Trend-test
rs80275639	14	105417313	C	0.02404	0	T	AHNAK2	0.007558
rs117917442	1	22191571	A	0.00237	0.02083	G	HSPG2	0.01082
rs201071549	14	105416113	A	0.004739	0.0303	G	AHNAK2	0.01246
rs2302694	2	170088351	A	0.02607	0.05871	G	LRP2	0.01519
rs2296807	23	55289720	T	0.04502	0.01894	C	PAGE3	0.02276
rs5924978	23	150791512	T	0.02133	0.005682	C	PASD1	0.03082
rs945815	23	150789950	C	0.03318	0.01326	T	PASD1	0.03585
rs375697874	11	1265534	T	0.03555	0.01515	C	MUC5B	0.03962
rs12494777	3	113374646	A	0.03318	0.01326	G	KIAA2018	0.04537
rs148927246	20	60893570	A	0.02844	0.01136	G	LAMA5	0.05281
rs75019370	5	89979925	C	0.01896	0.005682	T	GPR98	0.05592
rs2230377	12	26749831	A	0.06161	0.03598	G	ITPR2	0.06426
rs141000672	1	22199587	T	0.01659	0.03598	G	HSPG2	0.06476
rs568983781	14	105350748	A	0.007109	0.02273	G	CEP170B	0.06975
rs77689370	6	32549563	A	0.04265	0.02273	G	HLA-DRB1	0.07602
rs12286473	11	1264890	G	0.0237	0.00947	A	MUC5B	0.07807
rs184679972	1	155658184	A	0.01896	0.03977	C	DAP3,YY1AP1	0.07871
rs150661195	4	96171783	A	0.02607	0.01136	G	UNC5C	0.08649
rs76453246	14	105417285	G	0.01905	0.003802	C	AHNAK2	0.08933
rs895591	2	29274720	A	0.2844	0.3977	G	FAM179A	0.0002966
rs6089732	20	60893639	C	0.3483	0.447	G	LAMA5	0.002248
rs61749512	2	29274704	C	0.4455	0.5436	T	FAM179A	0.003289
rs213210	6	33175824	G	0.4502	0.5379	A	RING1,MIR219-1,HSD17B8,SLC39A7	0.006036
rs12336285	9	133028196	G	0.1517	0.09659	A	LOC101060175	0.01049
rs72240442	9	133028204	CGGCAGT	0.1517	0.09659	C	LOC101060175	0.01049
rs3741378	11	65408937	T	0.3744	0.2973	C	SIPA1,PCNXL3	0.01051
rs11551421	6	33053609	A	0.3602	0.437	G	HLA-DPB1	0.01104
rs9277351	6	33048600	T	0.5142	0.4356	G	HLA-DPA1,HLA-DPB1	0.01323
rs6721861	2	29246044	T	0.263	0.3352	C	FAM179A	0.01376
rs6478957	9	133048501	G	0.1896	0.1326	A	LOC101060175	0.01512
rs707958	6	33048599	C	0.1801	0.1269	A	HLA-DPA1,HLA-DPB1	0.01662
rs4282438	6	33072172	G	0.3626	0.4337	T	.	0.01835
rs944895	20	60887581	G	0.3009	0.233	A	LAMA5,ADRM1	0.01874
rs2274933	20	60897488	A	0.2227	0.1629	G	LAMA5	0.01925
rs2274934	20	60897487	C	0.2844	0.2178	T	LAMA5	0.02012
rs8074498	17	79954544	A	0.1445	0.197	T	ASPSCR1	0.03235
rs12613325	2	29226498	G	0.3318	0.3996	A	FAM179A	0.03609
rs2235862	20	50238545	G	0.1967	0.2538	A	ATP9A	0.04326
rs2379129	20	60885142	C	0.5355	0.4697	A	LAMA5,ADRM1	0.04348
rs2228600	19	19345802	T	0.03791	0.07008	C	NCAN	0.04451
rs2640908	1	7889941	T	0.5095	0.447	C	PER3	0.05007
rs915927	19	44057227	C	0.1422	0.1004	T	XRCC1	0.05774
rs1053966	21	38568009	G	0.1469	0.1932	C	TTC3	0.06054
rs3745345	19	17113147	G	0.1256	0.1686	A	CPAMD8	0.06359
rs17031614	1	7887605	A	0.2607	0.3144	G	PER3	0.06409
rs2075855	11	1248960	A	0.04028	0.06818	G	MUC5B	0.06542
rs10423874	19	19359500	G	0.1351	0.09848	C	NCAN	0.07176
rs1109758	2	29240783	G	0.2962	0.3485	A	FAM179A	0.07644
rs1126511	6	33048466	T	0.2512	0.2053	G	HLA-DPA1,HLA-DPB1	0.07709
rs67184706	6	32549622	G	0.2038	0.1648	GA	HLA-DRB1	0.07906
rs2116261	6	33025450	G	0.5071	0.4508	A	.	0.07937
rs3737137	20	60897721	T	0.1209	0.08712	C	LAMA5	0.08086
rs9533031	13	42772717	T	0.3507	0.4053	G	DGKH	0.0824
rs16893687	5	60982841	G	0.2607	0.3106	A	C5orf64	0.09049
rs3742261	13	42703682	C	0.2299	0.1856	T	DGKH	0.09333
rs2116260	6	33025440	T	0.4882	0.4356	C	.	0.09433
rs8031218	15	42982340	T	0.1611	0.1231	C	STARD9	0.09521
rs2275132	9	133911598	A	0.1801	0.2254	G	LAMC3	0.09604
rs17424145	6	32551915	G	0.07143	0.1042	A	HLA-DRB1	0.09982
